# Supplementary material for: Allosteric cross-talk between the hydrophobic cleft and the BH4 domain of Bcl-2 in control of inositol 1,4,5-trisphosphate receptor activity
Source: Explor Target Antitumor Ther. 2022 Jun 28;3(3):375–91. doi: 10.37349/etat.2022.00088 (PMC9400710; doi:10.37349/etat.2022.00088)
Supplement: Supplementary file 1 [file etat-03-100288-s001.pdf]

## Supplementary Information for

### **Allosteric cross-talk between the hydrophobic cleft and the BH4 domain of Bcl-2 in control of IP3R activity.**

Abigaël Ritaine<sup>1,2,3,\*</sup>, George Shapovalov<sup>1,2,\*§</sup>, Nadege Charlene Essonghe<sup>1,2</sup>, Ian de Ridder<sup>3</sup>, Hristina Ivanova<sup>3</sup>, Spyridoula Karamanou<sup>4</sup>, Anastassios Economou<sup>4</sup>, Geert Bultynck<sup>3</sup>, Roman Skryma<sup>1,2</sup>, Natalia Prevarskaya<sup>1,2,§</sup>

<sup>1</sup> Univ. Lille, Inserm, U1003 - PHYCEL - Physiologie Cellulaire, F-59000 Lille, France

<sup>2</sup> Laboratory of Excellence, Ion Channels Science and Therapeutics, Villeneuve d'Ascq, France

<sup>3</sup> KU Leuven, Laboratory of Molecular and Cellular Signaling, Department of Cellular and Molecular Medicine, Campus Gasthuisberg O/N-I bus 802, Herestraat 49, B-3000 Leuven, Belgium

<sup>4</sup> KU Leuven, Department of Microbiology and Immunology, Rega Institute of Medical Research, Laboratory of Molecular Bacteriology, Herestraat 49, B-3000 Leuven, Belgium

\* Shared first authorship.

§ Shared last authorship.

#### **This PDF file includes:**

Figs. S1 to S4

Table S1

Captions for movies S1 to S3

#### **Other supplementary materials for this manuscript include the following:**

Movies S1 to S3

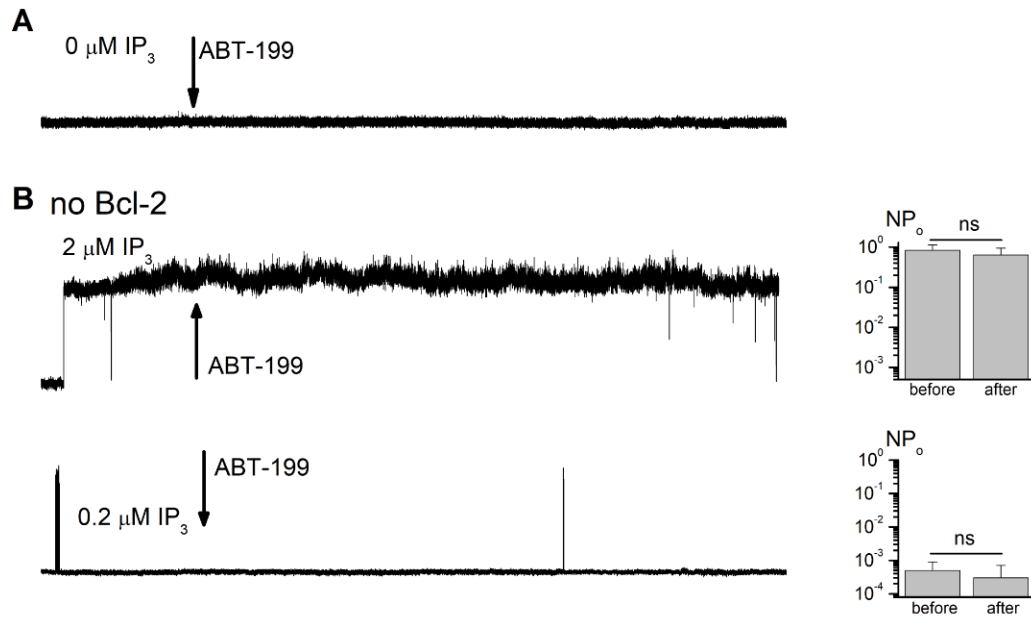

**Fig. S1.** Controls of the specificity of the ABT-199 effect upon IP3R:Bcl-2 interaction. (A) Sample traces showing the effect of application of 1  $\mu$ M ABT-199 in the absence of IP3. Note complete absence of the IP3R activity before or after the application of ABT-199. (B) Sample traces showing the effect of application of 1  $\mu$ M ABT-199 to the patches exhibiting IP3R activity stimulated by 2  $\mu$ M IP3 (top) or 0.2  $\mu$ M IP3 (bottom) in the absence of Bcl-2. Note the absence of ABT-199 effect under either conditions. Barplots on the right of summarize average  $P_0$  for the presented conditions ( $n=5$  and 4 correspondingly); ns indicates no significant difference.

**A**

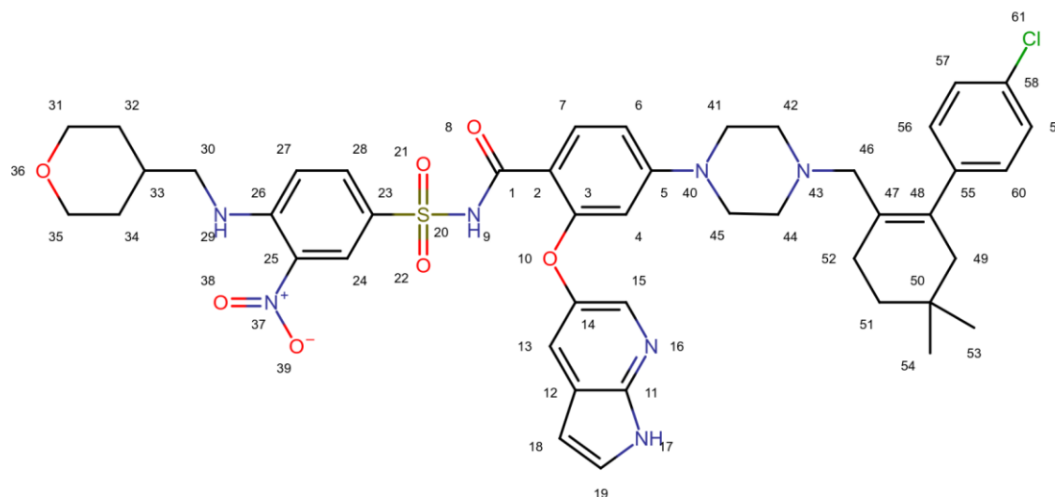

**B**

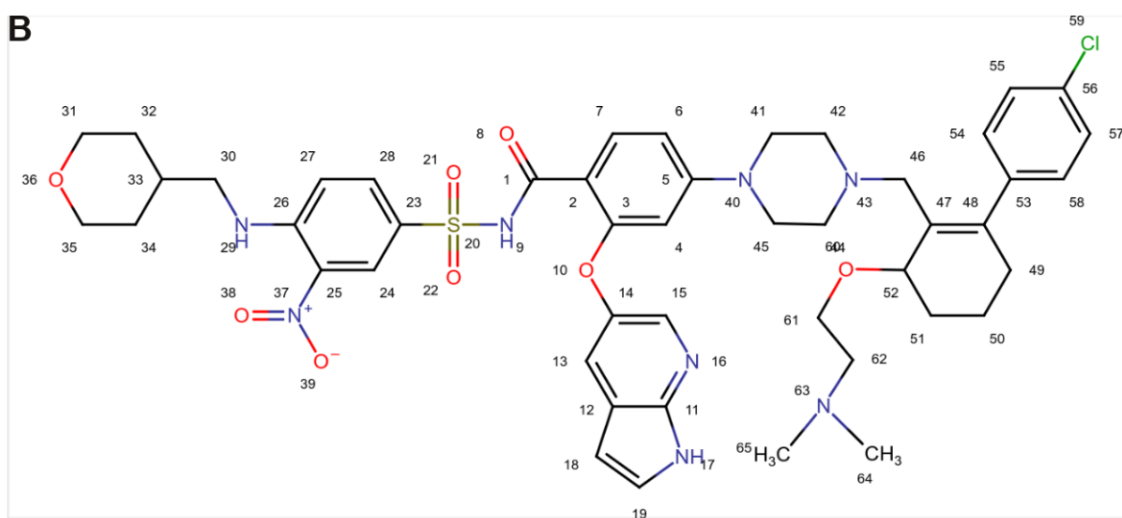

**Fig. S2.** Comparison of chemical structures of ABT-199 (*A*) with its closest analog with known structure (*B*) (Protein Data Bank entry [1Y1](#)). In order to obtain a representative 3D structure of the ABT-199 for further MD simulation, a closest analog with published 3D structure has been found and modified in PyMol by removing an unmatched sidechain at C<sub>52</sub> and adding two carbons at C<sub>50</sub>, as can be seen on the presented schemes. Schemes were prepared with the help of NIH service [ChemIDplus](#).

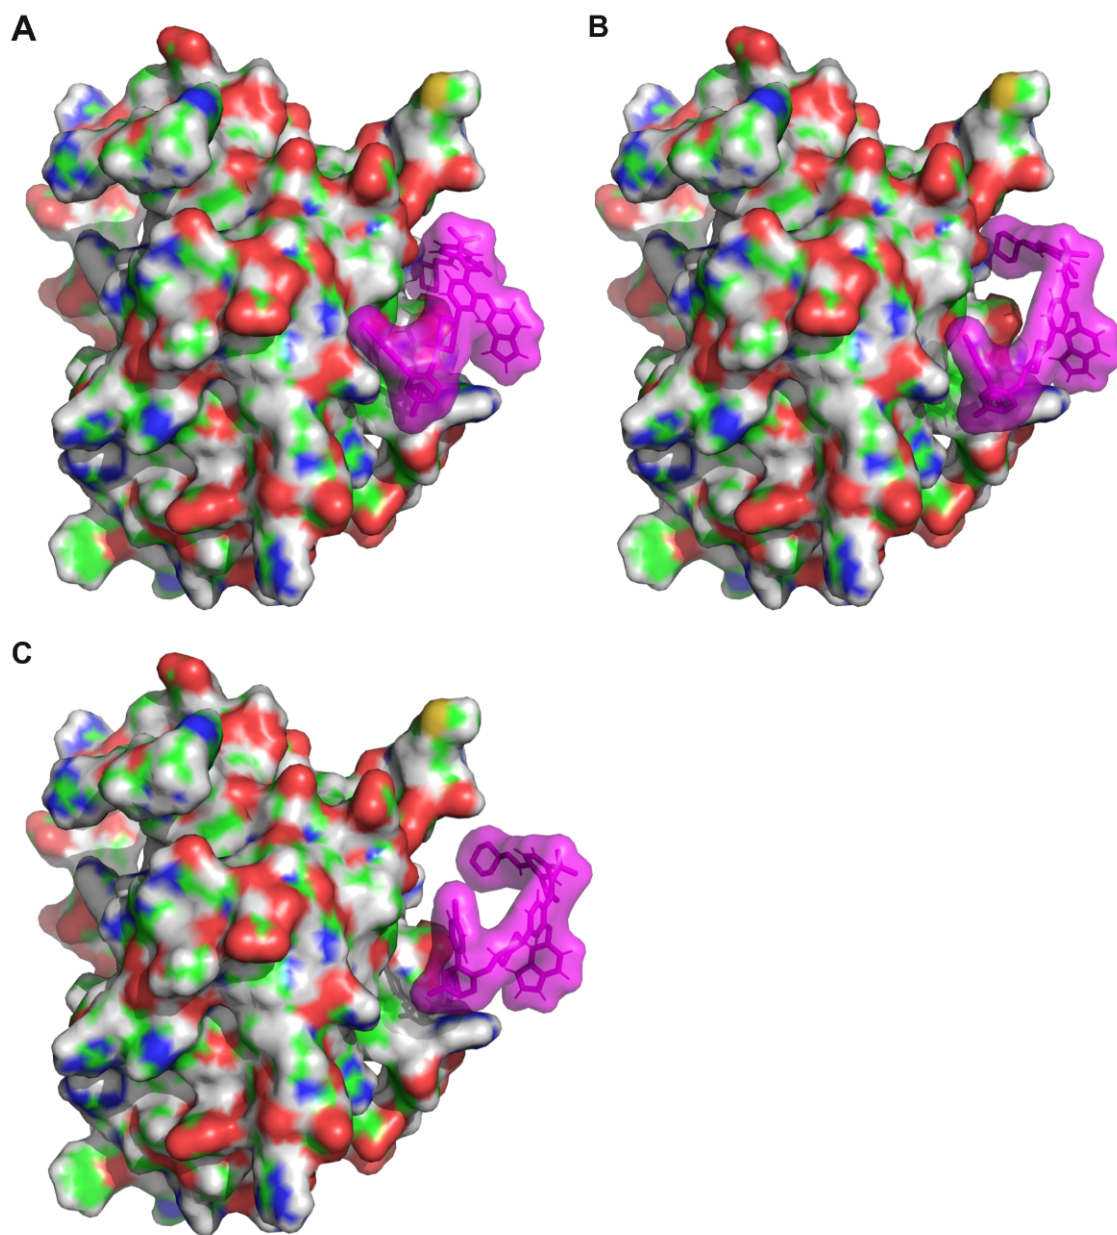

**Fig. S3.** Illustration of initial positioning of ABT-199 in the proximity of BH3 hydrophobic cleft of Bcl-2. ABT-199 was placed in close (*A*), near (*B*) and far (*C*) proximity ( $\sim 2$ , 5 and 10 Å respectively).

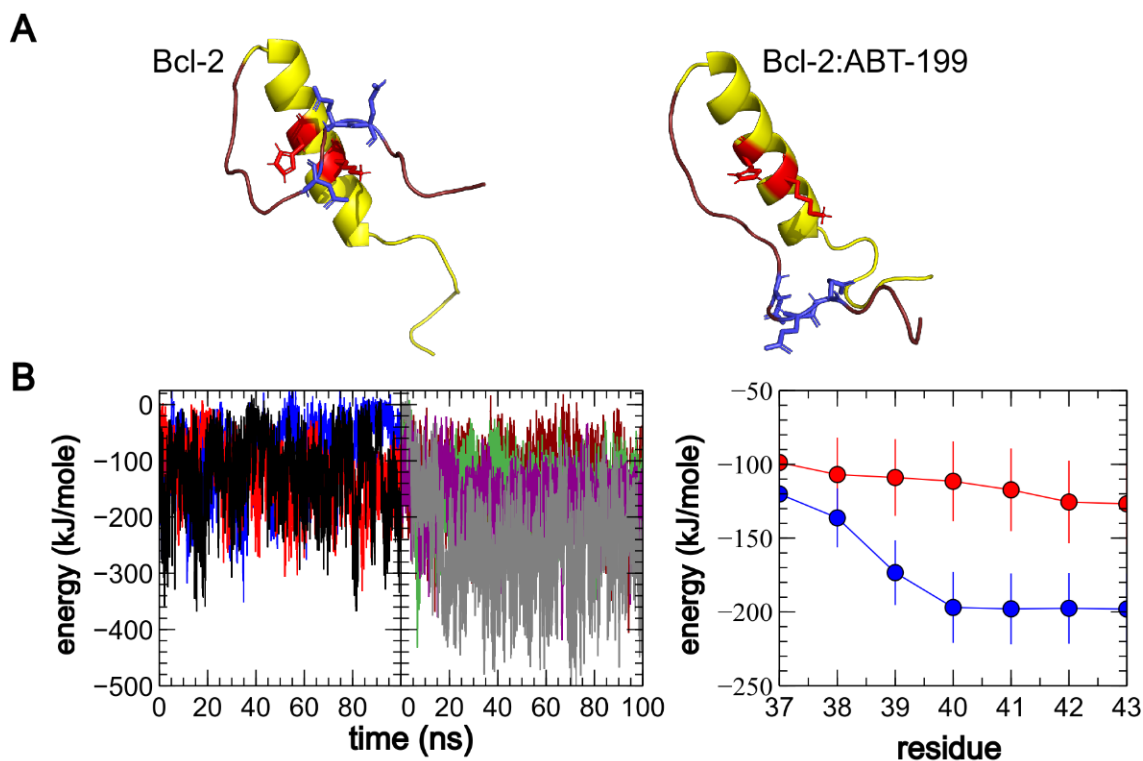

**Fig. S4. ABT-199 binding to Bcl-2 disrupts coulomb interaction between charged residues in the loop region and BH4 helix.** (A) Comparison of Bcl-2 fragment median structures, including BH4 and loop domains, in Bcl-2 alone (top) and Bcl:ABT complex (bottom). Note the realignment of the loop fragment immediately adjacent to BH4 and the disruption of the “hot-spot” interaction of charged residues (interacting residues are shown as sticks highlighted in red for positive His20 and Lys22, and blue for negative Asp35, Glu37 and Glu38). (B) (left) individual plots of Coulomb interaction energy between the first 10 residues of the Bcl-2 loop and the BH4  $\alpha$ -helix and, (right) evolution of average Coulomb interaction energies as a function of the loop fragment length indexed by the last residue. Note a significantly smaller Coulomb interaction energy between BH4 helix and loop fragments ending after residue 38 in Bcl:ABT complex, indicating disruption of the “hot-spot” interaction highlighted in panel A.

**Table S1. Table representing the different rates and energies for the kinetic models.**

| Rates (sec <sup>-1</sup> ) | 2μM IP3<br>no ABT-199 | 2μM IP3<br>+ 1μM ABT-199 | 5μM IP3<br>no ABT-199 | 5μM IP3<br>+ 1μM ABT-<br>199 |
|----------------------------|-----------------------|--------------------------|-----------------------|------------------------------|
| C1 → C3                    |                       | 629.73                   | 47.82                 | 8.58                         |
| C3 → C1                    |                       | 22.45                    | 1.79                  | 0.29                         |
| C1 → C4                    |                       | 37.19                    | 4226.17               | 438.11                       |
| C4 → C1                    |                       | 0.95                     | 29.74                 | 60.35                        |
| C1 → O2                    | 0.01                  | 52.58                    | 1018.19               | 62.91                        |
| O2 → C1                    | 295                   | 78.25                    | 10613                 | 293.49                       |
| C1 → O5                    |                       | 32.42                    | 1273.9                | 39.71                        |
| O5 → C1                    |                       | 1074.64                  | 524.69                | 57.06                        |

| Energy<br>(units of kT) | 2μM IP3<br>no ABT-199 | 2μM IP3<br>+ 1μM ABT-199 | 5μM IP3<br>no ABT-199 | 5μM IP3<br>+ 1μM ABT-199 |
|-------------------------|-----------------------|--------------------------|-----------------------|--------------------------|
| C1                      | 0                     | 0                        | 0                     | 0                        |
| O2                      | 10.39                 | 0.4                      | 2.34                  | 1.54                     |
| C3                      |                       | -3.33                    | -3.28                 | -3.37                    |
| C4                      |                       | -3.67                    | -4.96                 | -1.98                    |
| O5                      |                       | 3.5                      | -0.89                 | 0.36                     |

**Movies S1 and S2. An illustration of the interaction of Bcl-2 with ABT-199, showing the onset of the binding.** Bcl-2 is shown as a CPK colored surface and ABT-199 is represented by semi-transparent violet spheres. Movies show different projections of the first 10 ns of the same trajectory.

**Movie S3. An illustration of the changes in the BH4 domain of the Bcl-2 protein, following the ABT-199 binding.** The backbone of Bcl-2 protein is shown, with the BH4 domain highlighted in yellow and the first 10 residues of the loop domain highlighted in brown. ABT-199 is shown as violet semi-transparent spheres. Note the tail-flip event in the BH4 domain and the following adhesion of the fragment of the loop region to the BH4  $\alpha$ -helix.
